# Supplementary material for: Optimizing Tuberculosis Case Detection through a Novel Diagnostic Device Placement Model: The Case of Uganda
Source: PLOS journal article supplement (doi:10.1371/journal.pone.0122574), 2015-04-01
Supplement: S1 (10.1371/journal.pone.0122574.s001) [file journal.pone.0122574.s001.pdf › journal.pone.0122574.s001.pdf]

**S1. Ste Level Dataset.** Data from individual sites as obtained from the National TB Reference Laboratory, the National TB Control Program, and the National AIDS Control Program for 2011

| Facility Name            | Level     | District   | Smear<br>vol | eqa %<br>Pos<br>smears<br>ex | wl % Pos<br>smears<br>ex | eqa %<br>Scanty<br>smears<br>ex | wl %<br>Scanty<br>smears<br>ex | Tested | ART  | eqa Pos<br>smears<br>recheck | eqa Scanty<br>smears<br>recheck | eqa Neg<br>smears<br>recheck | eqa HFP<br>recheck | eqa HFN<br>recheck | eqa LFN<br>recheck | wl Pos<br>Scanty | wl<br>Neg<br>Scanty | wl Neg | wl %Pos | wl %<br>Scanty |
|--------------------------|-----------|------------|--------------|------------------------------|--------------------------|---------------------------------|--------------------------------|--------|------|------------------------------|---------------------------------|------------------------------|--------------------|--------------------|--------------------|------------------|---------------------|--------|---------|----------------|
| MICROBIOLOGY             | NRH       | KAMPALA    | 5309         | 0.15031                      | 0.15031                  | 0.0239                          | 0.0239                         | 3539   | 0    | 2                            | 0                               | 12                           | 0                  | 0                  | 0                  | 798              | 127                 | 4384   | 0.15    | 0.024          |
| WARD 5 & 6               | NRH       | KAMPALA    | 3119         | 0.17095                      | 0.17095                  | 0.0252                          | 0.0252                         | 2079   | 0    | 6                            | 0                               | 27                           | 2                  | 0                  | 0                  | 583              | 70                  | 2466   | 0.187   | 0.022          |
| ASSESSMENT CENTRE        | NRH       | KAMPALA    | 2134         | 0.27353                      | 0.27353                  | 0.0289                          | 0.0289                         | 1423   | 6285 | 8                            | 0                               | 22                           | 2                  | 0                  | 0                  | 582              | 62                  | 1490   | 0.273   | 0.029          |
| JINJA HOSPITAL           | RRH       | JINJA      | 1560         | 0.11951                      | 0.11951                  | 0.0227                          | 0.0227                         | 1040   | 1206 | 10                           | 6                               | 24                           | 0                  | 0                  | 0                  | 222              | 32                  | 1306   | 0.142   | 0.021          |
| FORTPORTAL R.R. HOSPITAL | RRH       | KABAROLE   | 1719         | 0.1757                       | 0.1757                   | 0.0151                          | 0.0151                         | 1146   | 3791 | 12                           | 3                               | 20                           | 0                  | 0                  | 0                  | 334              | 22                  | 1363   | 0.194   | 0.013          |
| IDI                      | SP Clinic | KAMPALA    | 1928         | 0.10373                      | 0.10373                  | 0.0415                          | 0.0415                         | 1285   | 7529 | 0                            | 0                               | 0                            | 0                  | 0                  | 0                  | 200              | 80                  | 1648   | 0.104   | 0.041          |
| KIBOGA HOSPITAL          | Hosp      | KIBOGA     | 1811         | 0.07277                      | 0.07277                  | 0.0104                          | 0.0104                         | 1207   | 949  | 5                            | 0                               | 34                           | 0                  | 0                  | 0                  | 130              | 16                  | 1665   | 0.072   | 0.009          |
| MITYANA HOSPITAL         | Hosp      | MITYANA    | 1538         | 0.14927                      | 0.14927                  | 0                               | 0                              | 1025   | 858  | 10                           | 0                               | 26                           | 0                  | 0                  | 0                  | 246              | 0                   | 1292   | 0.16    | 0              |
| TORORO HOSPITAL          | Hosp      | TORORO     | 1691         | 0.14679                      | 0.14679                  | 0                               | 0                              | 1127   | 622  | 8                            | 0                               | 31                           | 1                  | 0                  | 0                  | 257              | 0                   | 1434   | 0.152   | 0              |
| KAMULI HOSPITAL          | Hosp      | KAMULI     | 1629         | 0.06602                      | 0.06602                  | 0.0115                          | 0.0115                         | 1086   | 646  | 6                            | 5                               | 28                           | 0                  | 0                  | 0                  | 112              | 13                  | 1504   | 0.069   | 0.008          |
| BULUBA HOSPITAL          | Hosp      | MAYUGE     | 1535         | 0.10764                      | 0.10764                  | 0.0138                          | 0.0138                         | 1023   | 558  | 9                            | 3                               | 27                           | 0                  | 0                  | 0                  | 168              | 17                  | 1350   | 0.109   | 0.011          |
| PAG                      | HC IV     | LIRA       | 1565         | 0.12819                      | 0.12819                  | 0.0031                          | 0.0031                         | 1043   | 563  | 6                            | 0                               | 8                            | 0                  | 0                  | 0                  | 187              | 5                   | 1373   | 0.119   | 0.003          |
| KAWEMPE                  | HC IV     | KAMPALA    | 1147         | 0.1539                       | 0.1539                   | 0.023                           | 0.023                          | 765    | 1242 | 4                            | 0                               | 37                           | 0                  | 0                  | 0                  | 227              | 22                  | 898    | 0.198   | 0.019          |
| BUGIRI HOSPITAL          | Hosp      | BUGIRI     | 1113         | 0.12715                      | 0.12715                  | 0.0097                          | 0.0097                         | 742    | 874  | 4                            | 0                               | 35                           | 1                  | 0                  | 0                  | 156              | 8                   | 949    | 0.14    | 0.007          |
| KOBOKO HC IV             | HC IV     | KOBOKO     | 1147         | 0.11544                      | 0.11544                  | 0.0046                          | 0.0046                         | 765    | 103  | 16                           | 0                               | 21                           | 2                  | 0                  | 0                  | 140              | 3                   | 1004   | 0.122   | 0.003          |
| ABER HOSPITAL            | Hosp      | OYAM       | 1128         | 0.12098                      | 0.12098                  | 0.0008                          | 0.0008                         | 752    | 928  | 7                            | 0                               | 32                           | 1                  | 0                  | 0                  | 121              | 1                   | 1006   | 0.107   | 0.001          |
| MOROTO HOSPITAL          | RRH       | MOROTO     | 1109         | 0.1023                       | 0.1023                   | 0.0016                          | 0.0016                         | 739    | 142  | 7                            | 0                               | 41                           | 2                  | 0                  | 0                  | 124              | 1                   | 984    | 0.112   | 0.001          |
| BUYINJA HC III           | HC IV     | NAMAYING   | 1182         | 0.03641                      | 0.03641                  | 0.0024                          | 0.0024                         | 788    | 292  | 8                            | 0                               | 26                           | 0                  | 0                  | 0                  | 45               | 3                   | 1134   | 0.038   | 0.003          |
| KIHIIHI HC IV            | HC IV     | KANUNGU    | 1077         | 0.06343                      | 0.06343                  | 0.0157                          | 0.0157                         | 718    | 523  | 3                            | 1                               | 26                           | 0                  | 0                  | 0                  | 74               | 14                  | 989    | 0.069   | 0.013          |
| MBARARA HOSP.MICRO       | Hosp      | MBARARA    | 1014         | 0.10043                      | 0.10043                  | 0.0086                          | 0.0086                         | 676    | 7931 | 15                           | 2                               | 13                           | 0                  | 0                  | 0                  | 112              | 8                   | 894    | 0.11    | 0.008          |
| NKOZI HOSPITAL           | Hosp      | MPIGI      | 1023         | 0.11159                      | 0.11159                  | 0.0206                          | 0.0206                         | 682    | 823  | 7                            | 1                               | 34                           | 1                  | 0                  | 0                  | 126              | 20                  | 877    | 0.123   | 0.02           |
| KITEBI H.C               | HC III    | KAMPALA    | 852          | 0.14123                      | 0.14123                  | 0.0105                          | 0.0105                         | 568    | 922  | 8                            | 0                               | 27                           | 0                  | 0                  | 0                  | 137              | 11                  | 704    | 0.161   | 0.013          |
| MAYUGE HC III            | HC III    | MAYUGE     | 956          | 0.08318                      | 0.08318                  | 0.0113                          | 0.0113                         | 637    | 128  | 13                           | 0                               | 25                           | 2                  | 0                  | 0                  | 84               | 7                   | 865    | 0.088   | 0.007          |
| NAGONGERA HC IV          | HC IV     | TORORO     | 968          | 0.08095                      | 0.08095                  | 0.0029                          | 0.0029                         | 645    | 191  | 7                            | 1                               | 32                           | 0                  | 0                  | 0                  | 78               | 2                   | 888    | 0.081   | 0.002          |
| KIWOKO HOSPITAL          | Hosp      | NAKASEKE   | 942          | 0.10455                      | 0.10455                  | 0.0165                          | 0.0165                         | 628    | 625  | 3                            | 1                               | 26                           | 0                  | 0                  | 0                  | 104              | 13                  | 825    | 0.11    | 0.014          |
| KIYUNGA HC IV            | HC IV     | LUUKA      | 966          | 0.01175                      | 0.01175                  | 0                               | 0                              | 644    | 393  | 5                            | 0                               | 44                           | 0                  | 0                  | 0                  | 11               | 0                   | 955    | 0.011   | 0              |
| NAGALAMA HOSPITAL        | Hosp      | MUKONO     | 904          | 0.15415                      | 0.15415                  | 0.0158                          | 0.0158                         | 603    | 1151 | 9                            | 1                               | 28                           | 0                  | 0                  | 0                  | 146              | 15                  | 743    | 0.162   | 0.017          |
| TASO JINJA               | SP Clinic | JINJA      | 963          | 0.02783                      | 0.02783                  | 0.005                           | 0.005                          | 642    | 4692 | 1                            | 3                               | 35                           | 0                  | 0                  | 0                  | 28               | 5                   | 930    | 0.029   | 0.005          |
| MUTOLERE HOSPITAL        | Hosp      | KISORO     | 951          | 0.03144                      | 0.03144                  | 0                               | 0                              | 634    | 199  | 4                            | 0                               | 32                           | 1                  | 0                  | 0                  | 30               | 0                   | 921    | 0.032   | 0              |
| LYANTONDE HOSPITAL       | HC IV     | LYANTOND   | 900          | 0.15211                      | 0.15211                  | 0.0103                          | 0.0103                         | 600    | 664  | 10                           | 1                               | 20                           | 0                  | 0                  | 0                  | 148              | 9                   | 743    | 0.164   | 0.01           |
| LUWERO HC IV             | HC IV     | LUWERO     | 849          | 0.08562                      | 0.08562                  | 0.0053                          | 0.0053                         | 566    | 551  | 5                            | 0                               | 21                           | 0                  | 0                  | 0                  | 69               | 5                   | 775    | 0.081   | 0.006          |
| SOROTI RR HOSPITAL       | RRH       | SOROTI (40 | 773          | 0.07503                      | 0.07503                  | 0                               | 0                              | 515    | 2790 | 8                            | 0                               | 19                           | 0                  | 0                  | 0                  | 56               | 0                   | 717    | 0.072   | 0              |
| MASINDI HOSPITAL         | Hosp      | MASINDI    | 844          | 0.10155                      | 0.10155                  | 0                               | 0                              | 563    | 641  | 9                            | 0                               | 20                           | 2                  | 0                  | 0                  | 84               | 0                   | 760    | 0.1     | 0              |
| ADUKU HC IV              | HC IV     | APAC       | 806          | 0.13507                      | 0.13507                  | 0.0011                          | 0.0011                         | 537    | 580  | 9                            | 0                               | 30                           | 1                  | 0                  | 0                  | 117              | 1                   | 688    | 0.145   | 0.001          |
| BUDAKA HC IV             | HC IV     | BUDAKA     | 801          | 0.17182                      | 0.17182                  | 0.0069                          | 0.0069                         | 534    | 235  | 13                           | 0                               | 27                           | 1                  | 0                  | 0                  | 145              | 4                   | 652    | 0.181   | 0.005          |
| MADDU HC IV              | HC IV     | GOMBA      | 807          | 0.06893                      | 0.06893                  | 0.0023                          | 0.0023                         | 538    | 391  | 9                            | 0                               | 31                           | 0                  | 0                  | 0                  | 57               | 2                   | 748    | 0.071   | 0.002          |
| KAWOLO HOSPITAL          | Hosp      | BUIKWE     | 733          | 0.07774                      | 0.07774                  | 0.02                            | 0.02                           | 489    | 1105 | 11                           | 1                               | 27                           | 1                  | 0                  | 0                  | 63               | 17                  | 653    | 0.086   | 0.023          |
| KAYUNGA HOSPITAL         | Hosp      | KAYUNGA    | 671          | 0.11675                      | 0.11675                  | 0.0083                          | 0.0083                         | 447    | 1258 | 13                           | 0                               | 25                           | 0                  | 0                  | 0                  | 94               | 5                   | 572    | 0.14    | 0.007          |
| ST JOSEPH'S HOSP         | Hosp      | KITGUM     | 815          | 0.15603                      | 0.15603                  | 0.0118                          | 0.0118                         | 543    | 1487 | 5                            | 0                               | 28                           | 1                  | 0                  | 0                  | 121              | 6                   | 688    | 0.148   | 0.007          |
| KAZO HC IV               | HC IV     | KIRUHURA   | 772          | 0.0681                       | 0.0681                   | 0.0012                          | 0.0012                         | 515    | 12   | 3                            | 0                               | 23                           | 1                  | 0                  | 0                  | 53               | 1                   | 718    | 0.069   | 0.001          |

|                          |           |            |      |         |         |        |        |      |      |    |   |    |   |   |   |     |    |      |       |       |
|--------------------------|-----------|------------|------|---------|---------|--------|--------|------|------|----|---|----|---|---|---|-----|----|------|-------|-------|
| TASO ENTEBBE             | SP Clinic | WAKISO     | 763  | 0.07784 | 0.07784 | 0.0204 | 0.0204 | 509  | 3364 | 4  | 0 | 16 | 0 | 0 | 0 | 60  | 13 | 690  | 0.079 | 0.017 |
| REACH OUT MBUYA          | SP Clinic | KAMPALA    | 638  | 0.086   | 0.086   | 0.0356 | 0.0356 | 425  | 915  | 5  | 0 | 47 | 0 | 0 | 0 | 63  | 19 | 556  | 0.099 | 0.03  |
| NTWETWE HC IV            | HC IV     | KYANKWAN   | 706  | 0.09756 | 0.09756 | 0      | 0      | 471  | 457  | 4  | 0 | 36 | 0 | 0 | 0 | 73  | 0  | 633  | 0.103 | 0     |
| BUSOLWE HOSPITAL         | Hosp      | BUTALEJA   | 745  | 0.0552  | 0.0552  | 0      | 0      | 497  | 447  | 7  | 0 | 24 | 0 | 0 | 0 | 42  | 0  | 703  | 0.056 | 0     |
| RUHOKO IV                | HC IV     | IBANDA     | 679  | 0.11326 | 0.11326 | 0      | 0      | 453  | 180  | 7  | 0 | 23 | 1 | 0 | 0 | 77  | 0  | 602  | 0.113 | 0     |
| NAKASEKE HOSPITAL        | Hosp      | NAKASEKE   | 721  | 0.10236 | 0.10236 | 0      | 0      | 481  | 467  | 7  | 0 | 39 | 0 | 0 | 0 | 77  | 0  | 644  | 0.107 | 0     |
| MADI OPEI HCIII          | HC III    | LAMWO      | 659  | 0.10892 | 0.10892 | 0.0236 | 0.0236 | 439  | 363  | 5  | 0 | 34 | 0 | 0 | 0 | 70  | 12 | 577  | 0.106 | 0.018 |
| NANKOMA HC III           | HC III    | BUGIRI     | 668  | 0.12299 | 0.12299 | 0.0187 | 0.0187 | 445  | 321  | 4  | 0 | 36 | 0 | 0 | 0 | 83  | 9  | 576  | 0.124 | 0.013 |
| BUMANYA HC III           | HC III    | KALIRO     | 708  | 0.04178 | 0.04178 | 0.0108 | 0.0108 | 472  | 262  | 5  | 2 | 35 | 1 | 0 | 0 | 31  | 8  | 669  | 0.044 | 0.011 |
| KISIIZI HOSPITAL         | HC III    | RUKUNGIRI  | 700  | 0.10991 | 0.10991 | 0      | 0      | 467  | 901  | 6  | 0 | 25 | 0 | 0 | 0 | 80  | 0  | 620  | 0.114 | 0     |
| SERERE HC IV             | HC IV     | SERERE (40 | 688  | 0.0545  | 0.0545  | 0.0027 | 0.0027 | 459  | 305  | 9  | 2 | 19 | 0 | 0 | 0 | 38  | 0  | 650  | 0.055 | 0     |
| KIRYANDONGO HOSPITAL     | Hosp      | KIRYANDON  | 645  | 0.21379 | 0.21379 | 0.0069 | 0.0069 | 430  | 428  | 15 | 0 | 25 | 0 | 0 | 0 | 149 | 4  | 492  | 0.231 | 0.006 |
| KALISIZO HOSPITAL        | Hosp      | RAKAI      | 632  | 0.1841  | 0.1841  | 0.0153 | 0.0153 | 421  | 1146 | 1  | 2 | 7  | 0 | 0 | 0 | 126 | 9  | 497  | 0.199 | 0.014 |
| KABUYANDA HC IV          | HC IV     | ISINGIRO   | 655  | 0.05233 | 0.05233 | 0.0028 | 0.0028 | 437  | 216  | 4  | 0 | 27 | 0 | 0 | 0 | 34  | 0  | 621  | 0.052 | 0     |
| KAMBUGA HOSP             | Hosp      | KANUNGU    | 660  | 0.08677 | 0.08677 | 0.0028 | 0.0028 | 440  | 400  | 4  | 0 | 26 | 0 | 0 | 0 | 58  | 1  | 601  | 0.088 | 0.002 |
| MAKONDO HC III           | HC III    | LWENGO     | 603  | 0.17003 | 0.17003 | 0.0202 | 0.0202 | 402  | 0    | 4  | 0 | 24 | 1 | 0 | 0 | 113 | 8  | 482  | 0.187 | 0.013 |
| BUKOMERO HC IV           | HC IV     | KIBOGA     | 629  | 0.0708  | 0.0708  | 0.0029 | 0.0029 | 419  | 245  | 8  | 0 | 35 | 2 | 0 | 0 | 47  | 2  | 580  | 0.075 | 0.003 |
| KAMULI M HOSPITAL        | Hosp      | KAMULI     | 595  | 0.11061 | 0.11061 | 0.0061 | 0.0061 | 397  | 581  | 11 | 3 | 22 | 0 | 0 | 0 | 71  | 3  | 521  | 0.119 | 0.005 |
| ST. FRANCIS NJERU HC III | HC III    | BUIKWE     | 597  | 0.11846 | 0.11846 | 0.0338 | 0.0338 | 398  | 1381 | 13 | 0 | 17 | 0 | 0 | 0 | 76  | 22 | 499  | 0.127 | 0.037 |
| BUIKWE HOSPITAL          | HC III    | BUIKWE     | 573  | 0.09091 | 0.09091 | 0.0016 | 0.0016 | 382  | 679  | 8  | 0 | 32 | 0 | 0 | 0 | 53  | 1  | 519  | 0.092 | 0.002 |
| VIRIKA HOSPITAL          | Hosp      | KABAROLE   | 593  | 0.14937 | 0.14937 | 0.0204 | 0.0204 | 395  | 2051 | 5  | 1 | 24 | 0 | 0 | 0 | 91  | 13 | 489  | 0.153 | 0.022 |
| NAMUNGONA                | Hosp      | KAMPALA    | 474  | 0.11483 | 0.11483 | 0.0032 | 0.0032 | 316  | 868  | 7  | 0 | 38 | 0 | 0 | 0 | 61  | 0  | 413  | 0.129 | 0     |
| BWINDI COMM. HOSPITAL    | HC III    | KANUNGU    | 545  | 0.11309 | 0.11309 | 0.0307 | 0.0307 | 363  | 378  | 4  | 1 | 27 | 0 | 0 | 0 | 53  | 16 | 476  | 0.097 | 0.029 |
| ISHONGORO HCIV           | HC IV     | IBANDA     | 552  | 0.09804 | 0.09804 | 0.0033 | 0.0033 | 368  | 145  | 4  | 0 | 26 | 0 | 0 | 0 | 56  | 0  | 496  | 0.101 | 0     |
| TASO TORORO              | SP Clinic | TORORO     | 587  | 0.2     | 0.2     | 0.0033 | 0.0033 | 391  | 5203 | 5  | 1 | 35 | 2 | 0 | 0 | 122 | 2  | 463  | 0.208 | 0.003 |
| NAKASONGOLA IV           | HC IV     | NAKASONG   | 572  | 0.09651 | 0.09651 | 0.0017 | 0.0017 | 381  | 192  | 12 | 0 | 28 | 1 | 0 | 0 | 58  | 1  | 513  | 0.101 | 0.002 |
| KIRINYA MAIN PRISON      | HC III    | JINJA      | 598  | 0.00334 | 0.00334 | 0      | 0      | 399  | 0    | 2  | 0 | 20 | 0 | 0 | 0 | 2   | 0  | 596  | 0.003 | 0     |
| KITAGATA HOSPITAL        | Hosp      | SHEEMA     | 520  | 0.13969 | 0.13969 | 0      | 0      | 347  | 849  | 4  | 0 | 26 | 0 | 0 | 0 | 81  | 0  | 439  | 0.156 | 0     |
| KABERAMAIDO HC IV        | HC IV     | KABERAMA   | 556  | 0.125   | 0.125   | 0      | 0      | 371  | 739  | 4  | 0 | 6  | 0 | 0 | 0 | 70  | 0  | 486  | 0.126 | 0     |
| KAPCHORWA HOSPITAL       | Hosp      | KAPCHORWA  | 537  | 0.12326 | 0.12326 | 0.0017 | 0.0017 | 358  | 406  | 8  | 0 | 22 | 0 | 0 | 0 | 69  | 0  | 468  | 0.128 | 0     |
| BUGOBERO HC III          | HC III    | MANAFA (4  | 528  | 0.07491 | 0.07491 | 0.007  | 0.007  | 352  | 64   | 4  | 0 | 26 | 0 | 0 | 0 | 41  | 2  | 485  | 0.078 | 0.004 |
| IRUNDU HC III            | HC III    | BUYENDE    | 535  | 0.08803 | 0.08803 | 0.0141 | 0.0141 | 357  | 0    | 5  | 0 | 34 | 1 | 0 | 0 | 40  | 6  | 489  | 0.075 | 0.011 |
| MATETE III               | HC III    | SEMBABUL   | 486  | 0.125   | 0.125   | 0.0071 | 0.0071 | 324  | 297  | 12 | 1 | 17 | 0 | 0 | 0 | 67  | 4  | 415  | 0.138 | 0.008 |
| ANGAL HOSPITAL           | Hosp      | NEBBI      | 498  | 0.22321 | 0.22321 | 0      | 0      | 332  | 204  | 9  | 0 | 16 | 1 | 0 | 0 | 119 | 0  | 379  | 0.239 | 0     |
| MOYO HOSPITAL            | Hosp      | MOYO       | 460  | 0.1288  | 0.1288  | 0      | 0      | 307  | 454  | 7  | 0 | 22 | 0 | 0 | 0 | 64  | 0  | 396  | 0.139 | 0     |
| BUSESA HC IV             | HC IV     | IGANGA     | 502  | 0.13357 | 0.13357 | 0      | 0      | 335  | 0    | 9  | 0 | 31 | 1 | 0 | 0 | 71  | 0  | 431  | 0.141 | 0     |
| KIGANDALO HC IV          | HC IV     | MAYUGE     | 499  | 0.06375 | 0.06375 | 0.0073 | 0.0073 | 333  | 222  | 6  | 4 | 22 | 0 | 0 | 0 | 35  | 4  | 460  | 0.07  | 0.008 |
| KITYERERA HC IV          | HC IV     | MAYUGE     | 487  | 0.08103 | 0.08103 | 0.0018 | 0.0018 | 325  | 251  | 12 | 1 | 22 | 1 | 0 | 0 | 43  | 1  | 443  | 0.088 | 0.002 |
| KITOVU HOSPITAL          | Hosp      | MASAKA     | 515  | 0.15472 | 0.15472 | 0.0208 | 0.0208 | 343  | 1121 | 9  | 1 | 20 | 0 | 0 | 0 | 77  | 11 | 427  | 0.15  | 0.021 |
| KIBUKU HC IV             | HC IV     | KIBUKU     | 328  | 0.35283 | 0.35283 | 0      | 0      | 219  | 285  | 9  | 1 | 20 | 0 | 0 | 0 | 15  | 0  | 313  | 0.046 | 0     |
| PADIBE HCIV              | HC IV     | LAMWO      | 485  | 0.07471 | 0.07471 | 0.0057 | 0.0057 | 323  | 529  | 5  | 3 | 32 | 0 | 0 | 0 | 36  | 2  | 447  | 0.074 | 0.004 |
| LWAMATA                  | HC III    | KIBOGA     | 499  | 0.04457 | 0.04457 | 0.0039 | 0.0039 | 333  | 0    | 3  | 1 | 35 | 0 | 0 | 0 | 22  | 2  | 475  | 0.044 | 0.004 |
| SEMBABULE HC IV          | HC IV     | SEMBABUL   | 449  | 0.07312 | 0.07312 | 0.0059 | 0.0059 | 299  | 137  | 11 | 1 | 18 | 0 | 0 | 0 | 37  | 2  | 410  | 0.082 | 0.004 |
| BUYENDE HC III           | HC III    | BUYENDE    | 450  | 0.06375 | 0.06375 | 0.002  | 0.002  | 300  | 0    | 3  | 0 | 36 | 1 | 0 | 0 | 27  | 1  | 422  | 0.06  | 0.002 |
| ARUA R. R. HOSPITAL      | RRH       | ARUA       | 2538 | 0.11609 | 0.11609 | 0.0104 | 0.0104 | 1692 | 6231 | 12 | 2 | 23 | 0 | 1 | 0 | 296 | 25 | 2217 | 0.117 | 0.01  |

|                            |           |          |      |         |         |        |        |      |      |    |   |    |   |   |   |     |    |      |       |       |
|----------------------------|-----------|----------|------|---------|---------|--------|--------|------|------|----|---|----|---|---|---|-----|----|------|-------|-------|
| GOMBE HOSPITAL             | Hosp      | BUTAMBAL | 1102 | 0.12531 | 0.12531 | 0.0008 | 0.0008 | 735  | 1313 | 11 | 0 | 19 | 0 | 1 | 0 | 147 | 0  | 955  | 0.133 | 0     |
| MASAAFU HC III             | HC III    | BUSIA    | 716  | 0.07234 | 0.07234 | 0.0102 | 0.0102 | 477  | 941  | 11 | 0 | 19 | 0 | 1 | 0 | 55  | 7  | 654  | 0.077 | 0.01  |
| KULUVA HOSPITAL            | Hosp      | ARUA     | 475  | 0.1     | 0.1     | 0.0098 | 0.0098 | 317  | 341  | 12 | 0 | 26 | 1 | 0 | 1 | 48  | 5  | 422  | 0.101 | 0.011 |
| MPIGI HC IV                | HC IV     | MPIGI    | 554  | 0.13554 | 0.13554 | 0.0083 | 0.0083 | 369  | 867  | 11 | 0 | 25 | 1 | 1 | 0 | 79  | 5  | 470  | 0.143 | 0.009 |
| MURCHINSON BAY             | Hosp      | KAMPALA  | 484  | 0.08494 | 0.08494 | 0.0116 | 0.0116 | 323  | 746  | 9  | 1 | 71 | 0 | 0 | 1 | 43  | 6  | 435  | 0.089 | 0.012 |
| KAGADI HOSPITAL            | Hosp      | KIBAALE  | 949  | 0.20391 | 0.20391 | 0.0103 | 0.0103 | 633  | 1072 | 10 | 0 | 22 | 1 | 1 | 0 | 196 | 10 | 743  | 0.207 | 0.011 |
| ABOKE HC IV                | HC IV     | KOLE     | 621  | 0.18429 | 0.18429 | 0.0129 | 0.0129 | 414  | 908  | 9  | 1 | 28 | 1 | 0 | 1 | 122 | 7  | 492  | 0.196 | 0.011 |
| LACOR HOSPITAL             | Hosp      | GULU     | 1450 | 0.23381 | 0.23381 | 0      | 0      | 967  | 3656 | 15 | 2 | 23 | 0 | 2 | 0 | 368 | 0  | 1082 | 0.254 | 0     |
| MUKONO HC IV               | HC IV     | MUKONO   | 1214 | 0.10637 | 0.10637 | 0.0149 | 0.0149 | 809  | 245  | 6  | 3 | 30 | 1 | 1 | 0 | 143 | 19 | 1052 | 0.118 | 0.016 |
| HOIMA R.R.HOSPITAL         | RRH       | HOIMA    | 1028 | 0.20769 | 0.20769 | 0.0009 | 0.0009 | 685  | 1977 | 8  | 0 | 30 | 0 | 1 | 0 | 220 | 1  | 807  | 0.214 | 0.001 |
| BRAC                       | SP Clinic | PADER    | 947  | 0.07223 | 0.07223 | 0.0131 | 0.0131 | 631  | 0    | 8  | 1 | 19 | 1 | 1 | 0 | 74  | 14 | 859  | 0.078 | 0.015 |
| KAWAALA H.C                | HC III    | KAMPALA  | 574  | 0.12433 | 0.12433 | 0.0294 | 0.0294 | 383  | 1123 | 8  | 0 | 33 | 0 | 1 | 0 | 89  | 18 | 467  | 0.155 | 0.031 |
| NSAMBYA HOSP               | Hosp      | KAMPALA  | 3055 | 0.12339 | 0.12339 | 0.0177 | 0.0177 | 2037 | 3868 | 7  | 0 | 19 | 0 | 0 | 1 | 383 | 53 | 2619 | 0.125 | 0.017 |
| RUBAGA HOSPITAL            | Hosp      | KAMPALA  | 1849 | 0.17631 | 0.17631 | 0.0097 | 0.0097 | 1233 | 1276 | 7  | 0 | 24 | 0 | 1 | 0 | 326 | 18 | 1505 | 0.176 | 0.01  |
| KAGANDO HOSPITAL           | Hosp      | KASESE   | 558  | 0.11809 | 0.11809 | 0.0419 | 0.0419 | 372  | 433  | 7  | 0 | 13 | 0 | 0 | 1 | 69  | 15 | 474  | 0.124 | 0.027 |
| COMBONI HOSPITAL           | Hosp      | BUSHENYI | 646  | 0.07481 | 0.07481 | 0.0076 | 0.0076 | 431  | 1481 | 7  | 0 | 24 | 0 | 0 | 1 | 46  | 5  | 595  | 0.071 | 0.008 |
| UGANDA CARES MSK           | SP Clinic | MASAKA   | 520  | 0.31863 | 0.31863 | 0.0016 | 0.0016 | 347  | 5090 | 7  | 0 | 24 | 0 | 1 | 0 | 190 | 1  | 329  | 0.365 | 0.002 |
| AMUDAT HOSPITAL            | Hosp      | AMUDAT   | 506  | 0.11265 | 0.11265 | 0.0017 | 0.0017 | 337  | 11   | 13 | 1 | 29 | 1 | 2 | 0 | 55  | 1  | 450  | 0.109 | 0.002 |
| IGANGA HOSPITAL            | Hosp      | IGANGA   | 2082 | 0.15904 | 0.15904 | 0.0034 | 0.0034 | 1388 | 1100 | 7  | 0 | 23 | 1 | 0 | 1 | 361 | 6  | 1715 | 0.173 | 0.003 |
| LIRA REGIONAL REFFERAL HOS | RRH       | LIRA     | 1720 | 0.15742 | 0.15742 | 0.0219 | 0.0219 | 1147 | 4621 | 6  | 0 | 9  | 0 | 1 | 0 | 275 | 41 | 1404 | 0.16  | 0.024 |
| NYENGA HOSPITAL            | Hosp      | BUIKWE   | 600  | 0.11128 | 0.11128 | 0.0119 | 0.0119 | 400  | 636  | 7  | 0 | 33 | 1 | 1 | 0 | 74  | 8  | 518  | 0.123 | 0.013 |
| ADJUMANI HOSPITAL          | Hosp      | ADJUMANI | 446  | 0.21223 | 0.21223 | 0.0108 | 0.0108 | 297  | 504  | 10 | 1 | 15 | 0 | 2 | 0 | 109 | 5  | 332  | 0.244 | 0.011 |
| GULU REG HOSP              | RRH       | GULU     | 1183 | 0.22977 | 0.22977 | 0      | 0      | 789  | 1523 | 6  | 0 | 23 | 1 | 1 | 0 | 275 | 0  | 908  | 0.232 | 0     |
| KIBULI HOSPITAL            | Hosp      | KAMPALA  | 588  | 0.12925 | 0.12925 | 0.0051 | 0.0051 | 392  | 341  | 6  | 0 | 30 | 1 | 0 | 1 | 76  | 3  | 509  | 0.129 | 0.005 |
| BRAC HC                    | SP Clinic | KITGUM   | 1224 | 0.0653  | 0.0653  | 0.0047 | 0.0047 | 816  | 0    | 10 | 0 | 25 | 1 | 2 | 0 | 78  | 5  | 1141 | 0.064 | 0.004 |
| MUBENDE HOSPITAL           | RRH       | MUBENDE  | 1251 | 0.15801 | 0.15801 | 0.0098 | 0.0098 | 834  | 2392 | 4  | 0 | 25 | 0 | 0 | 1 | 210 | 13 | 1028 | 0.168 | 0.01  |
| KAABONG HOSPITAL           | Hosp      | KAABONG  | 737  | 0.11617 | 0.11617 | 0.0156 | 0.0156 | 491  | 159  | 16 | 2 | 22 | 2 | 1 | 3 | 87  | 9  | 641  | 0.118 | 0.012 |
| KIDERA HC III              | HC IV     | BUYENDE  | 713  | 0.0853  | 0.0853  | 0.0223 | 0.0223 | 475  | 269  | 4  | 0 | 37 | 0 | 0 | 1 | 54  | 10 | 649  | 0.076 | 0.014 |
| KALONGO HOSPITAL           | Hosp      | AGAGO    | 564  | 0.13651 | 0.13651 | 0      | 0      | 376  | 905  | 4  | 0 | 14 | 0 | 0 | 1 | 76  | 0  | 488  | 0.135 | 0     |
| KILEMBE HOSPITAL           | Hosp      | KASESE   | 536  | 0.13912 | 0.13912 | 0.0606 | 0.0606 | 357  | 1123 | 9  | 0 | 21 | 1 | 2 | 0 | 74  | 20 | 442  | 0.138 | 0.037 |
| KISENYI                    | HC IV     | KAMPALA  | 1248 | 0.17396 | 0.17396 | 0.031  | 0.031  | 832  | 1968 | 7  | 0 | 26 | 0 | 1 | 1 | 296 | 29 | 923  | 0.237 | 0.023 |
| BRAC HC                    | SP Clinic | NEBBI    | 794  | 0.04709 | 0.04709 | 0      | 0      | 529  | 0    | 8  | 0 | 31 | 1 | 1 | 1 | 38  | 0  | 756  | 0.048 | 0     |
| MATANYI HOSPITAL           | Hosp      | NAPAK    | 2073 | 0.16928 | 0.16928 | 0.0195 | 0.0195 | 1382 | 311  | 19 | 0 | 35 | 0 | 2 | 4 | 318 | 17 | 1738 | 0.153 | 0.008 |
| MENGO HOSPITAL             | Hosp      | KAMPALA  | 1728 | 0.15567 | 0.15567 | 0.0127 | 0.0127 | 1152 | 2711 | 7  | 0 | 33 | 1 | 1 | 1 | 269 | 22 | 1437 | 0.156 | 0.013 |
| MILD MAY CENTRE            | Hosp      | WAKISO   | 1258 | 0.10247 | 0.10247 | 0.0102 | 0.0102 | 839  | 6291 | 3  | 0 | 17 | 0 | 1 | 0 | 135 | 14 | 1109 | 0.107 | 0.011 |
| KISORO HOSPITAL            | Hosp      | KISORO   | 1039 | 0.03707 | 0.03707 | 0      | 0      | 693  | 700  | 3  | 0 | 27 | 0 | 0 | 1 | 40  | 0  | 999  | 0.038 | 0     |
| MALONGO HC III             | HC III    | MAYUGE   | 726  | 0.04901 | 0.04901 | 0      | 0      | 484  | 0    | 6  | 0 | 30 | 3 | 1 | 0 | 36  | 0  | 690  | 0.05  | 0     |
| LUZIRA UPPER PRISON        | Hosp      | KAMPALA  | 632  | 0.01345 | 0.01345 | 0.0135 | 0.0135 | 421  | 746  | 4  | 0 | 36 | 1 | 1 | 0 | 9   | 7  | 616  | 0.014 | 0.011 |
| KAMWOKYA                   | HC IV     | KAMPALA  | 571  | 0.13154 | 0.13154 | 0.019  | 0.019  | 381  | 2131 | 4  | 0 | 16 | 1 | 1 | 0 | 77  | 12 | 482  | 0.135 | 0.021 |
| REACH OUT- KINAWATAKA      | SP Clinic | KAMPALA  | 630  | 0.06412 | 0.06412 | 0.0407 | 0.0407 | 420  | 1110 | 5  | 0 | 35 | 1 | 2 | 0 | 42  | 21 | 567  | 0.067 | 0.033 |
| NAWAIKOKE HC III           | HC III    | KALIRO   | 672  | 0.02755 | 0.02755 | 0.0055 | 0.0055 | 448  | 132  | 2  | 0 | 41 | 0 | 0 | 1 | 19  | 3  | 650  | 0.028 | 0.004 |
| KAWEMPE HOME CARE          | SP Clinic | KAMPALA  | 374  | 0.11494 | 0.11494 | 0.0345 | 0.0345 | 249  | 416  | 6  | 1 | 33 | 0 | 2 | 2 | 54  | 12 | 308  | 0.144 | 0.032 |
| KISSWA                     | HC III    | KAMPALA  | 1587 | 0.17818 | 0.17818 | 0.0264 | 0.0264 | 1058 | 2216 | 6  | 0 | 45 | 1 | 3 | 0 | 348 | 37 | 1202 | 0.219 | 0.023 |
| DOKOLO HC IV               | HC IV     | DOKOLO   | 874  | 0.14952 | 0.14952 | 0.0106 | 0.0106 | 583  | 874  | 7  | 0 | 23 | 2 | 2 | 1 | 137 | 9  | 728  | 0.157 | 0.01  |
| RUGAZI HC IV               | HC IV     | RUBIRIZI | 434  | 0.07952 | 0.07952 | 0.0099 | 0.0099 | 289  | 229  | 3  | 0 | 30 | 0 | 1 | 1 | 39  | 5  | 390  | 0.09  | 0.012 |

|                   |           |         |      |         |         |        |        |      |      |   |   |    |   |   |   |     |    |      |       |       |
|-------------------|-----------|---------|------|---------|---------|--------|--------|------|------|---|---|----|---|---|---|-----|----|------|-------|-------|
| ANYEKE HCIII      | HC IV     | OYAM    | 507  | 0.1825  | 0.1825  | 0.0037 | 0.0037 | 338  | 440  | 8 | 1 | 20 | 1 | 3 | 3 | 92  | 2  | 413  | 0.181 | 0.004 |
| BUTABIKA HOSPITAL | NRH       | KAMPALA | 1007 | 0.16476 | 0.16476 | 0.0229 | 0.0229 | 671  | 510  | 6 | 0 | 34 | 1 | 2 | 2 | 172 | 18 | 817  | 0.171 | 0.018 |
| MASAKA HOSPITAL   | RRH       | MASAKA  | 1727 | 0.18307 | 0.18307 | 0.0222 | 0.0222 | 1151 | 5090 | 4 | 0 | 25 | 1 | 3 | 0 | 333 | 40 | 1354 | 0.193 | 0.023 |
| LUWUNGA BARRACKS  | SP Clinic | WAKISO  | 1019 | 0.07762 | 0.07762 | 0.0153 | 0.0153 | 679  | 0    | 1 | 0 | 16 | 0 | 1 | 0 | 79  | 9  | 931  | 0.078 | 0.009 |
| KABALE HOSPITAL   | RRH       | KABALE  | 640  | 0.11411 | 0.11411 | 0      | 0      | 427  | 2412 | 1 | 0 | 9  | 0 | 1 | 0 | 75  | 0  | 565  | 0.117 | 0     |
| NAMUNGALWE HC III | HC III    | IGANGA  | 493  | 0.09981 | 0.09981 | 0      | 0      | 329  | 165  | 4 | 0 | 34 | 1 | 2 | 1 | 50  | 0  | 443  | 0.101 | 0     |
| NSINZE HC IV      | HC IV     | NAMUTUM | 469  | 0.03689 | 0.03689 | 0.0078 | 0.0078 | 313  | 207  | 2 | 0 | 28 | 0 | 2 | 0 | 17  | 4  | 448  | 0.036 | 0.009 |
| APAC HOSPITAL     | Hosp      | APAC    | 1584 | 0.10845 | 0.10845 | 0.0054 | 0.0054 | 1056 | 1579 | 6 | 0 | 33 | 0 | 7 | 2 | 174 | 8  | 1402 | 0.11  | 0.005 |
| KIZIBA HC III     | HC III    | WAKISO  | 614  | 0.02729 | 0.02729 | 0      | 0      | 409  | 0    | 1 | 0 | 28 | 1 | 2 | 1 | 17  | 0  | 597  | 0.028 | 0     |

#### Key

|                           |                                                                                                                                                                                                        |
|---------------------------|--------------------------------------------------------------------------------------------------------------------------------------------------------------------------------------------------------|
| Facility Name             | Facility name                                                                                                                                                                                          |
| Level                     | Health care center level (NRH: National Referral Hospital, RRH: Regional Referral Hospital, Hosp: General Hospital, HC IV: Health Care Level IV, HC III: Health Care Level III, SP Clinic: HIV center) |
| District                  | District                                                                                                                                                                                               |
| Smear Vol                 | Total number smear samples performed                                                                                                                                                                   |
| eqa % Pos smears ex       | Proportion of smears reported as AFB positive by facility reviewed by EQA                                                                                                                              |
| wl % Pos smears ex        | Proportion of smears reported as AFB positive by facility                                                                                                                                              |
| eqa % Scanty smears ex    | Proportion of smears reported as AFB scanty by facility as reviewed by EQA                                                                                                                             |
| wl % Scanty smears ex     | Proportion of smears reported as AFB scanty by facility                                                                                                                                                |
| Tested                    | Number of individuals tested for TB                                                                                                                                                                    |
| ART                       | Cumulative number of patients ever enrolled on ART                                                                                                                                                     |
| eqa Pos smears recheck    | Number of smears reported as AFB positive by EQA                                                                                                                                                       |
| eqa Scanty smears recheck | Number of smears reported as AFB scanty by EQA                                                                                                                                                         |
| eqa Neg smears recheck    | Number of smears reported as AFB negative by EQA                                                                                                                                                       |
| eqa HFP recheck           | Number of smears reported as AFB positive by facility but AFB negative by EQA                                                                                                                          |
| eqa HFN recheck           | Number of smears reported as AFB negative by facility but AFB positive by EQA                                                                                                                          |
| eqa LFN recheck           | Number of smears reported as AFB negative by facility but AFB scanty by EQA                                                                                                                            |
| wl Pos                    | Number of smears reported as AFB positive by facility                                                                                                                                                  |
| wl Scanty                 | Number of smears reported as AFB scanty by facility                                                                                                                                                    |
| wl Neg                    | Number of smears reported as AFB negative by facility                                                                                                                                                  |
| wl % Pos                  | Proportion of smears reported as AFB positive by facility                                                                                                                                              |
| wl % Scanty               | Proportion of smears reported as AFB scanty by facility                                                                                                                                                |

ART: Antiretroviral Therapy

EQA: External Quality  
Assessment
